# Supplementary material for: Highly stretchable conductive MWCNT–PDMS composite with self-enhanced conductivity
Source: Royal Society of Chemistry journal article supplement (doi:10.1039/d0tc01735c), 2020-01-01
Supplement: d0tc01735c1.pdf [file d0tc01735c1.pdf]

## Supporting information

# Highly stretchable conductive MWCNT-PDMS composite with self-enhanced conductivity

Jiang Shao, Liyun Yu, Anne Ladegaard Skov and Anders E. Daugaard\*

### This PDF file includes:

Table S1: The dependence of conductivity on concentration of MWCNTs in SC-PDMS and LC-PDMS.

Fig. S1 the dependence of conductivity on concentration of MWCNTs in SC-PDMS and LC-PDMS.

Fig. S2 Electrical properties of MWCNTs/PDMS composites and reference samples

Fig. S3 rheological properties of MWCNTs/PDMS composites

Fig. S4 electrical conductivity of MWCNTs/PDMS composites with 2+0.6 phr MWCNTs as a function of stretching–releasing cycles with 30% strain

Fig. S5 Stretchability and conductivity of samples prepared by different methods (2.6 phr MWCNTs).

Fig. S6 Behaviour of normalized resistances of MWCNTs/PDMS composites and reference samples under different strains

Table. S2 comparison of our results with other published results.

Fig. S7 SEM micrographs of uniformly dispersed MWCNT in PDMS at 2.6 phr

Fig. S8 dielectric spectroscopy of MWCNTs/PDMS composites.

---

Department of Chemical and Biochemical Engineering, Danish Polymer Centre, Technical University of Denmark, 2800, Denmark. E-mail: [adt@kt.dtu.dk](mailto:adt@kt.dtu.dk)

**Table S1:** The dependence of conductivity on concentration of MWCNTs in SC-PDMS and LC-PDMS.

| Conductivity (S/m)                   | MWCNTs from LC-domain (phr, overall) |                       |                       |                       |                       |
|--------------------------------------|--------------------------------------|-----------------------|-----------------------|-----------------------|-----------------------|
| MWCNTs from SC-domain (phr, overall) | 0                                    | 0.2                   | 0.4                   | 0.6                   | 0.8                   |
| 0.5                                  | 0                                    | 0                     | $8.65 \times 10^{-5}$ | $1.75 \times 10^{-4}$ | ---                   |
| 1                                    | $5.03 \times 10^{-4}$                | $1.07 \times 10^{-3}$ | $1.88 \times 10^{-3}$ | $1.83 \times 10^{-4}$ | $6.83 \times 10^{-4}$ |
| 2                                    | $3.28 \times 10^{-5}$                | $1.69 \times 10^{-2}$ | $1.89 \times 10^{-2}$ | $3.81 \times 10^{-2}$ | $1.03 \times 10^{-2}$ |

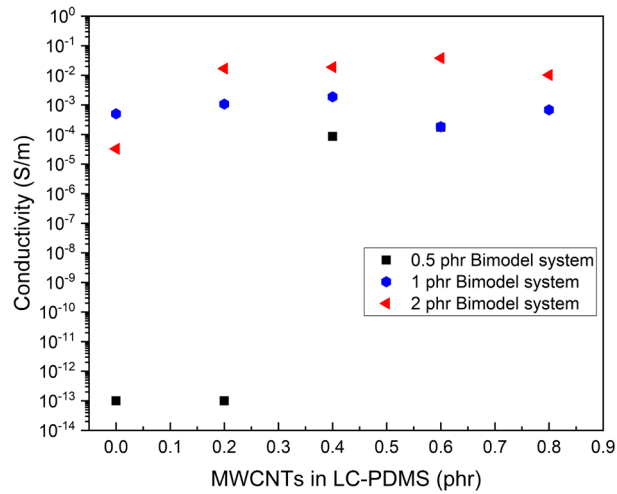

**Fig. S1** the dependence of conductivity on concentration of MWCNTs in SC-PDMS and LC-PDMS.

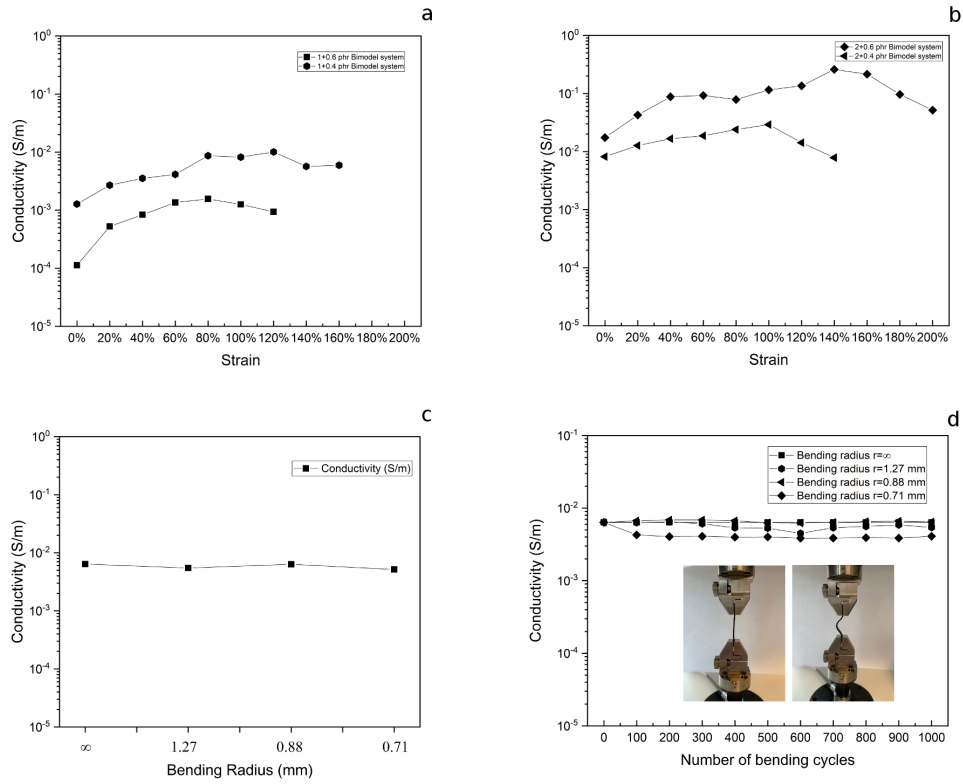

**Fig. S2** Electrical properties of MWCNTs/PDMS composites and reference samples: a) Conductivity of MWCNTs/PDMS composites with 1+0.4 phr and 1+0.6 phr MWCNTs under different strains. b) Conductivity of MWCNTs/PDMS composites with 2+0.4 phr and 2+0.6 phr MWCNTs under different strains. c) Conductivity of MWCNTs/PDMS composites with 2+0.6 phr MWCNTs at different bending radiuses. d) Conductivity of MWCNTs/PDMS composites with 2+0.6 phr MWCNTs at different bending radiuses and bending cycles.

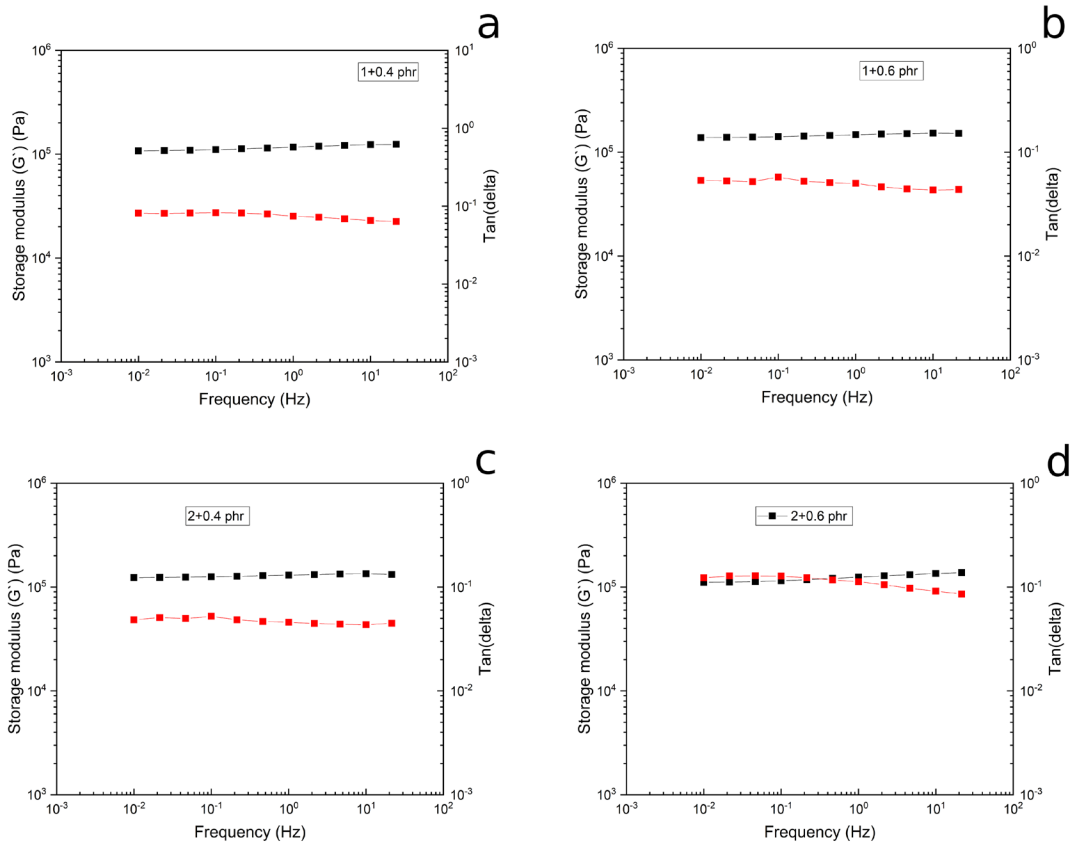

**Fig. S3** rheological properties of MWCNTs/PDMS composites: a) rheological properties of MWCNTs/PDMS composites with 1+0.4 phr MWCNTs b) rheological properties of MWCNTs/PDMS composites with 1+0.6 phr MWCNTs. c) rheological properties of MWCNTs/PDMS composites with 2+0.4 phr MWCNTs. d) rheological properties of MWCNTs/PDMS composites with 2+0.6 phr MWCNTs.

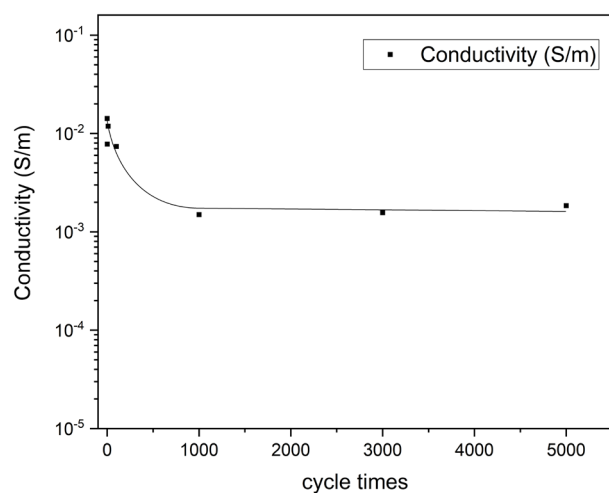

**Fig. S4** electrical conductivity of MWCNTs/PDMS composites with 2+0.6 phr MWCNTs as a function of stretching–releasing cycles with 30% strain

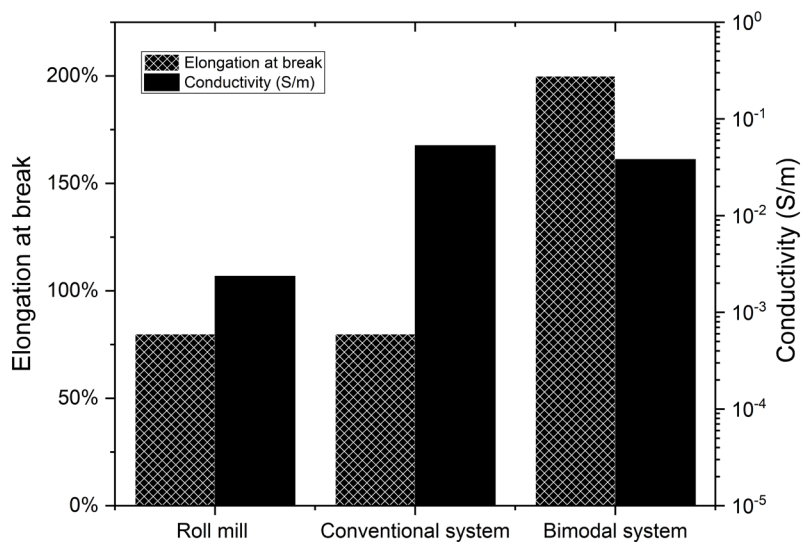

**Fig. S5** Stretchability and conductivity of samples prepared by different methods (2.6 phr MWCNTs).

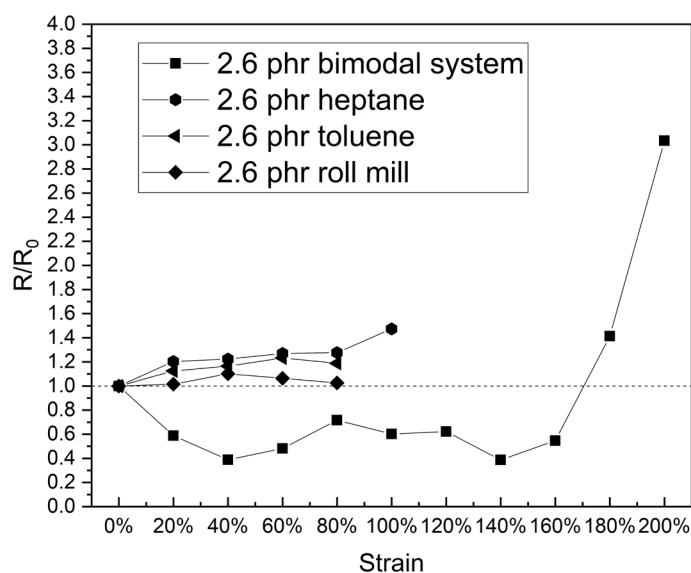

**Fig. S6** Behaviour of normalized resistances of MWCNTs/PDMS composites and reference samples under different strains (All samples are from a formulation point of view identical but the preparation schemes are varied).

**Table. S2** comparison of our results with other published results.

| Fillers/polymer   | Filler content    | Conductivity (S/m)      | Reference                  |
|-------------------|-------------------|-------------------------|----------------------------|
| MWCNT/PDMS        | 3 wt%             | $\sim 1 \times 10^{-3}$ | Hassouneh S S, et al.[1]   |
| MWCNT/PDMS        | 1 wt%             | $\sim 1 \times 10^{-6}$ | Goswami K, et al.[2]       |
| SWCNT/epoxy       | 5 wt%             | $\sim 1 \times 10^{-3}$ | Kim B, et al.[3]           |
| SWCNT/polystyrene | 8.5 wt%           | $1.3 \times 10^{-5}$    | Barraza H J, et al.[4]     |
| MWCNT/PDMS        | 2.3 wt% (2.6 phr) | $3.8 \times 10^{-2}$    | Shao J, et al. (This work) |

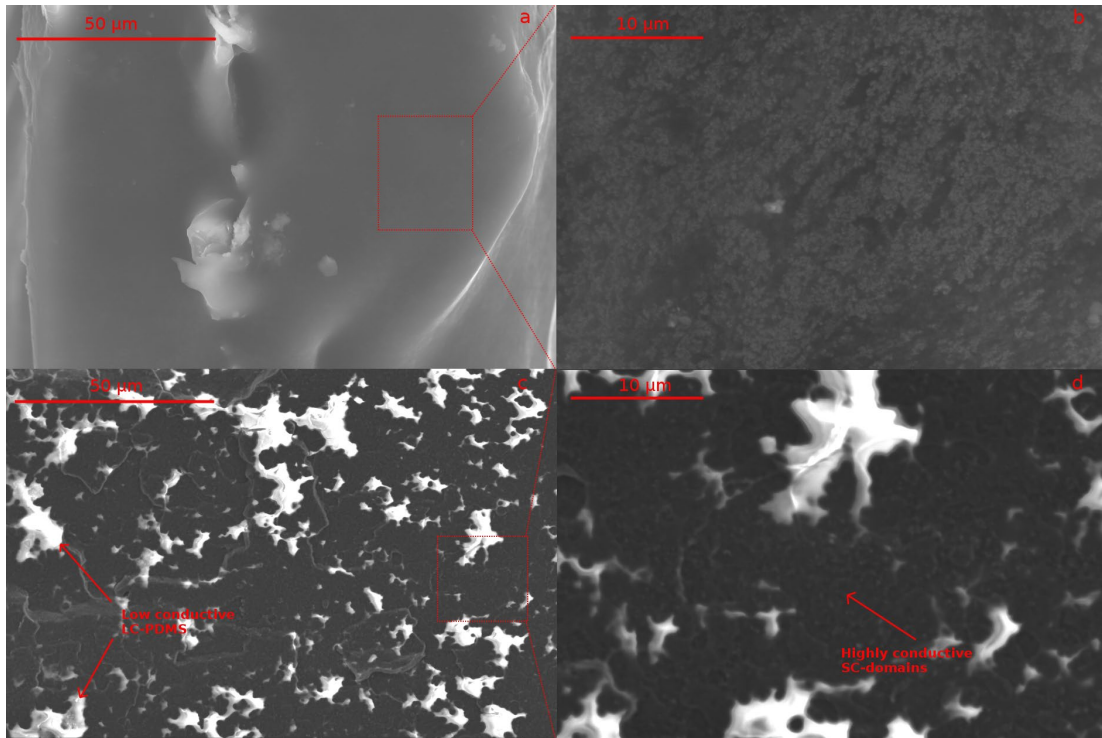

**Fig. S7:** SEM micrographs of uniformly dispersed MWCNT in PDMS at 2.6 phr (a, b), and the corresponding bimodal MWCNT/PDMS system with 2+0.6 phr MWCNT (c, d). The anisotropic distribution from the bimodal mixing process is clear from the mixture of highly conductive and isolating regions in the sample.

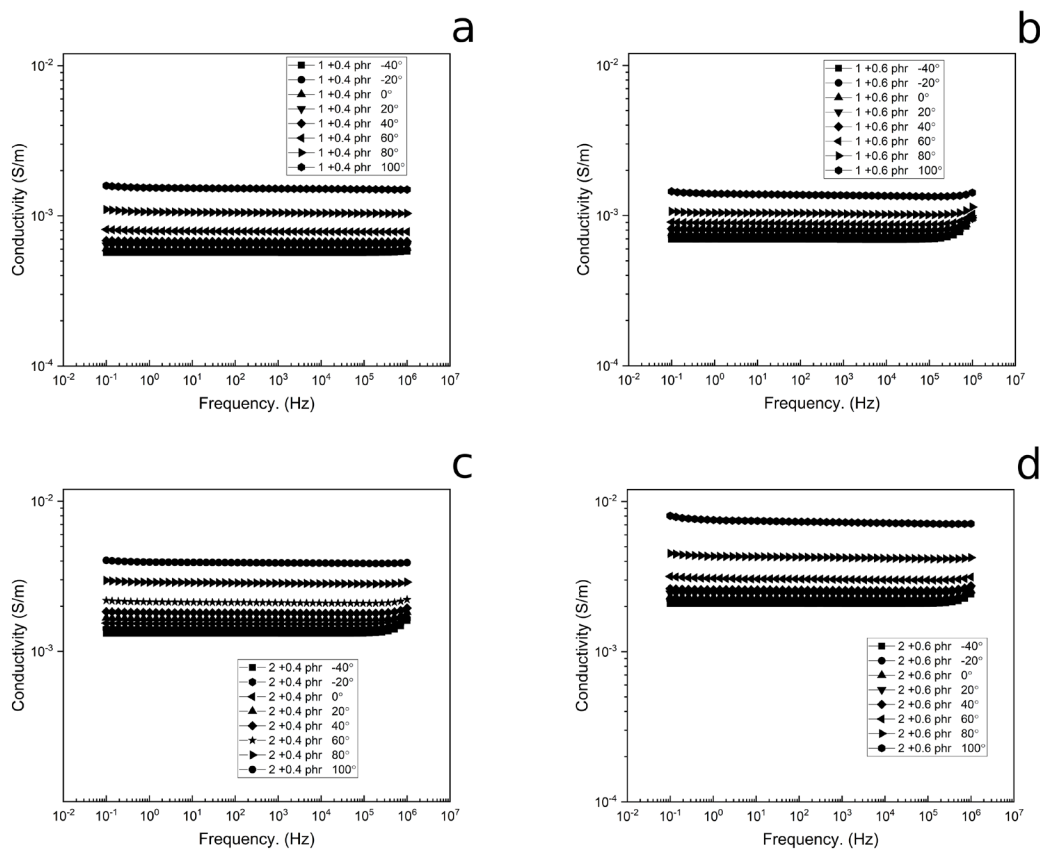

**Fig. S8** dielectric spectroscopy of MWCNTs/PDMS composites: a) dielectric properties of MWCNTs/PDMS composites with 1+0.4 phr MWCNTs b) dielectric properties of MWCNTs/PDMS composites with 1+0.6 phr MWCNTs. c) dielectric properties of MWCNTs/PDMS composites with 2+0.4 phr MWCNTs. d) dielectric properties of MWCNTs/PDMS composites with 2+0.6 phr MWCNTs.

#### References:

- [1] S.S. Hassouneh, L. Yu, A.L. Skov, A.E. Daugaard, Soft and flexible conductive PDMS/MWCNT composites, *J. Appl. Polym. Sci.* 134 (2017) 1–9. <https://doi.org/10.1002/app.44767>.
- [2] K. Goswami, A.E. Daugaard, A.L. Skov, Dielectric properties of ultraviolet cured poly(dimethyl siloxane) sub-percolative composites containing percolative amounts of multi-walled carbon nanotubes, *RSC Adv.* 5 (2015) 12792–12799. <https://doi.org/10.1039/c4ra14637a>.
- [3] B. Kim, J. Lee, I. Yu, Electrical properties of single-wall carbon nanotube and epoxy composites, *J. Appl. Phys.* 94 (2003) 6724–6728.
- [4] H.J. Barraza, F. Pompeo, E.A. O’Rea, D.E. Resasco, SWNT-filled thermoplastic and elastomeric composites prepared by miniemulsion polymerization, *Nano Lett.* 2 (2002) 797–802.
